# Supplementary material
Source: publisher figshare collection journal article supplement (https://gsajournals.figshare.com/ndownloader/files/13991195)
Supplement: Supplementary file 1 [file 13991195]

## Sheet: TableS20
Table S20 Summary of the annotation of genes with Ka/Ks >1 and P < 0.05 from M. baccata and M. domestica.
Gene Pairs	Ka/Ks	P-Value	Rgene or TF	Annotation
				Swissprot	KEGG	GO	Interpro
MABA001780-XM_008375660	14.5174	0.0431357		P00302 Stellacyanin	-	molecular_function:GO:0009055//electron carrier activity;	IPR003245; Phytocyanin domain
MABA002758-XM_017332248	2.85639	0.0425746	TIR	Q40392 TMV resistance protein N	K07466 replication factor A1	-	IPR000157; Toll/interleukin-1 receptor homology (TIR) domain
MABA003302-XM_008383778	7.15176	0.0255787		-	K12812 ATP-dependent RNA helicase UAP56/SUB2 [EC:3.6.4.13]	-	IPR007700; Protein of unknown function DUF668
MABA004286-XM_008367384	2.69388	0.0205964		-	-	-	-
MABA004462-XM_017328116	2.12645	0.024383		Q9ZPS7 Transmembrane 9 superfamily member 3	K17087 transmembrane 9 superfamily member 3	-	IPR004240; Nonaspanin (TM9SF)
MABA004827-XM_008345833	2.60528	0.000471487		Q8CIT9 Suprabasin	-	-	-
MABA009758-XM_008382820	1.98374	2.45837e-06		O65717 Cyclic nucleotide-gated ion channel 1	K05391 cyclic nucleotide gated channel, other eukaryote	-	IPR000595; Cyclic nucleotide-binding domain
MABA010913-XM_017334506	1.82107	0.00481079	TIR-NBS-LLR	Q40392 TMV resistance protein N	K03283 heat shock 70kDa protein 1/8	-	IPR000157; Toll/interleukin-1 receptor homology (TIR) domain
MABA011066-XM_008353188	2.5589	0.0070274		-	K20393 PRA1 family protein 3	-	IPR001594; Zinc finger, DHHC-type, palmitoyltransferase
MABA013576-XM_017335705	1.47226	0.0283842	CC-NBS-LLR	Q7XBQ9 Disease resistance protein RGA2	K01657 anthranilate synthase component I [EC:4.1.3.27]	-	IPR002182; NB-ARC
MABA015870-XM_008349070	3.74422	0.00940587		-	-	-	-
MABA017015-XM_008355993	1.50497	0.0279072	TIR	F4JNB7 Disease resistance protein RPP5	K14309 nuclear pore complex protein Nup93	-	IPR000157; Toll/interleukin-1 receptor homology (TIR) domain
MABA019222-XM_008361162	1.587	0.00127548		O65717 Cyclic nucleotide-gated ion channel 1	K05391 cyclic nucleotide gated channel, other eukaryote	-	IPR000595; Cyclic nucleotide-binding domain
MABA019396-XM_008343819	1.71782	0.0296305		O23530 Protein SUPPRESSOR OF npr1-1, CONSTITUTIVE 1	K19613 leucine-rich repeat protein SHOC2	-	IPR000157; Toll/interleukin-1 receptor homology (TIR) domain
MABA020498-XM_017336273	3.74721	0.0084519		-	-	-	-
MABA020730-XM_017323720	1.61867	0.000446251	TIR-NBS-LLR	Q40392 TMV resistance protein N	K19613 leucine-rich repeat protein SHOC2	-	IPR000157; Toll/interleukin-1 receptor homology (TIR) domain
MABA022461-XM_008387046	5.44894	0.0479829		Q9M670 Protein RESTRICTED TEV MOVEMENT 2	K13993 HSP20 family protein	-	IPR002068; Alpha crystallin/Hsp20 domain
MABA025785-XM_008372701	7.07875	0.0265469		O22808 Protein LYK5	K04730 interleukin-1 receptor-associated kinase 1 [EC:2.7.11.1]	-	IPR018392; LysM domain
MABA028935-XM_008342560	49.2926	0.0478316	MYB_relate	O22264 Transcription factor MYB12	K09422 myb proto-oncogene protein, plant	-	IPR001005; SANT/Myb domain
MABA031307-XM_008363143	1.48353	0.0349599	RLP	Q9C9H7 Receptor-like protein 12	K10406 kinesin family member C2/C3	-	IPR001611; Leucine-rich repeat
MABA033017-XM_008376547	2.90407	0.00168515		-	-	-	-
MABA033019-XM_008376583	3.13244	0.00045446		-	-	-	-
MABA041735-XM_008347106	2.35039	0.00147034		-	-	-	-
MABA042452-XM_008387795	1.49544	0.032068	TIR	Q40392 TMV resistance protein N	K19613 leucine-rich repeat protein SHOC2	-	IPR000157; Toll/interleukin-1 receptor homology (TIR) domain
MABA045713-XM_008348179	23.7147	0.0072282		-	K20000 maturase K	-	IPR001878; Zinc finger, CCHC-type
